# Supplementary material
Source: PubMed Central journal article supplement (PMC8536323)
Supplement: pnas.2107320118.sapp.pdf [file pnas.2107320118.sapp.pdf]

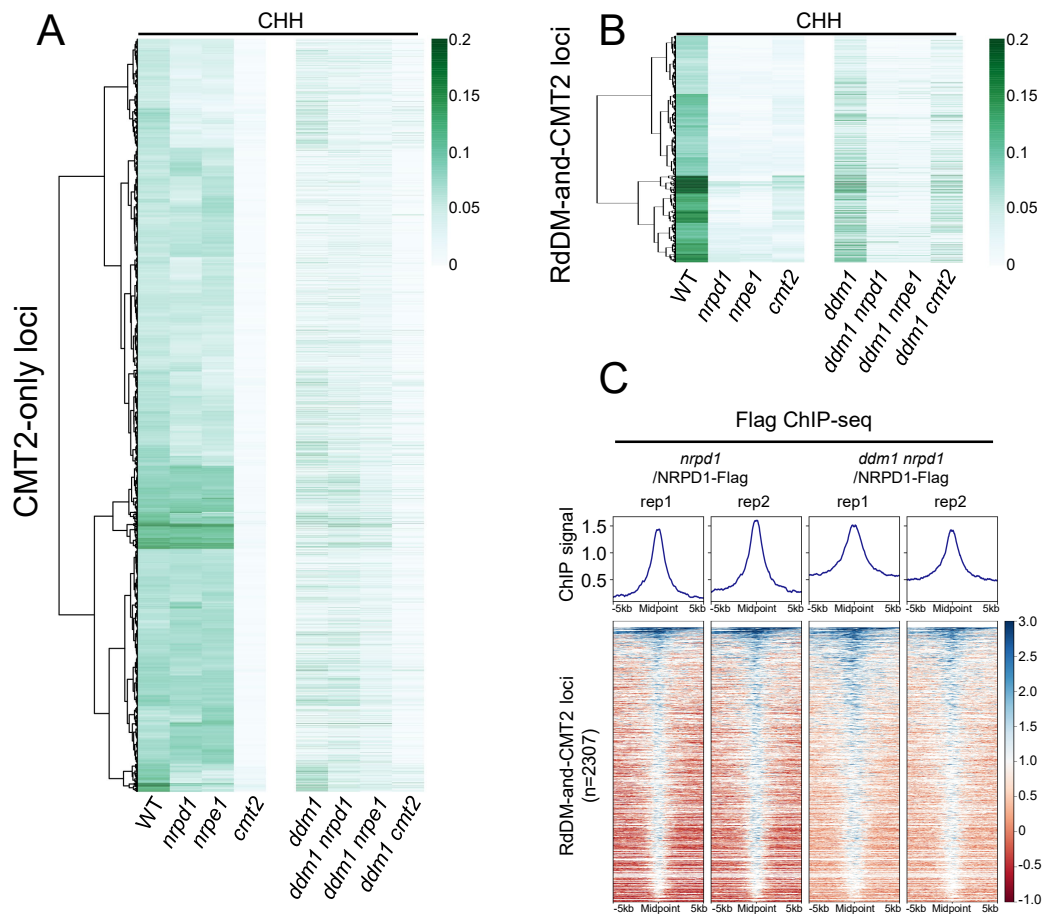

**Supplementary Fig. 1. Classification of CHH hypo-DMRs into four major categories.**

(A) Heatmap of CHH methylation levels in CMT2-only loci. Columns represent data for each indicated genotype; rows represent loci.

(B) Heatmap of CHH methylation levels in RdDM-and-CMT2 loci.

(C) Metaplot and heatmap of NRPD1 ChIP-seq signals in RdDM-and-CMT2 loci.

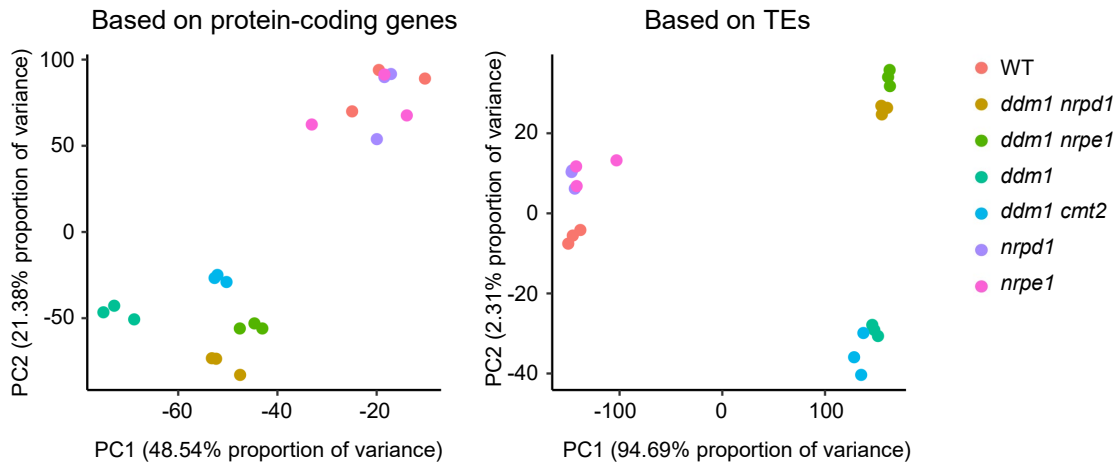

**Supplementary Fig. 2. Principal component analysis (PCA) of the indicated transcriptomes.**

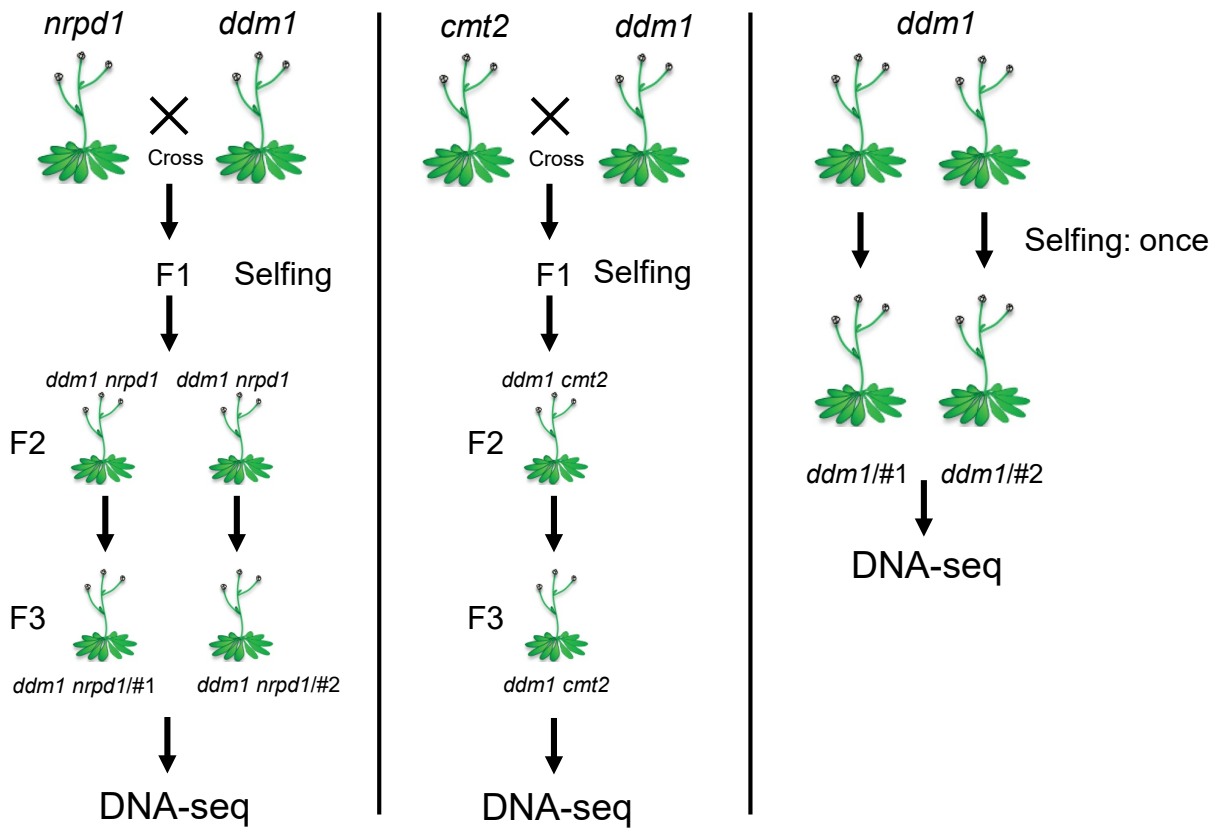

Supplementary Fig. 3. Flow diagram showing the generation of materials for DNA-seq.

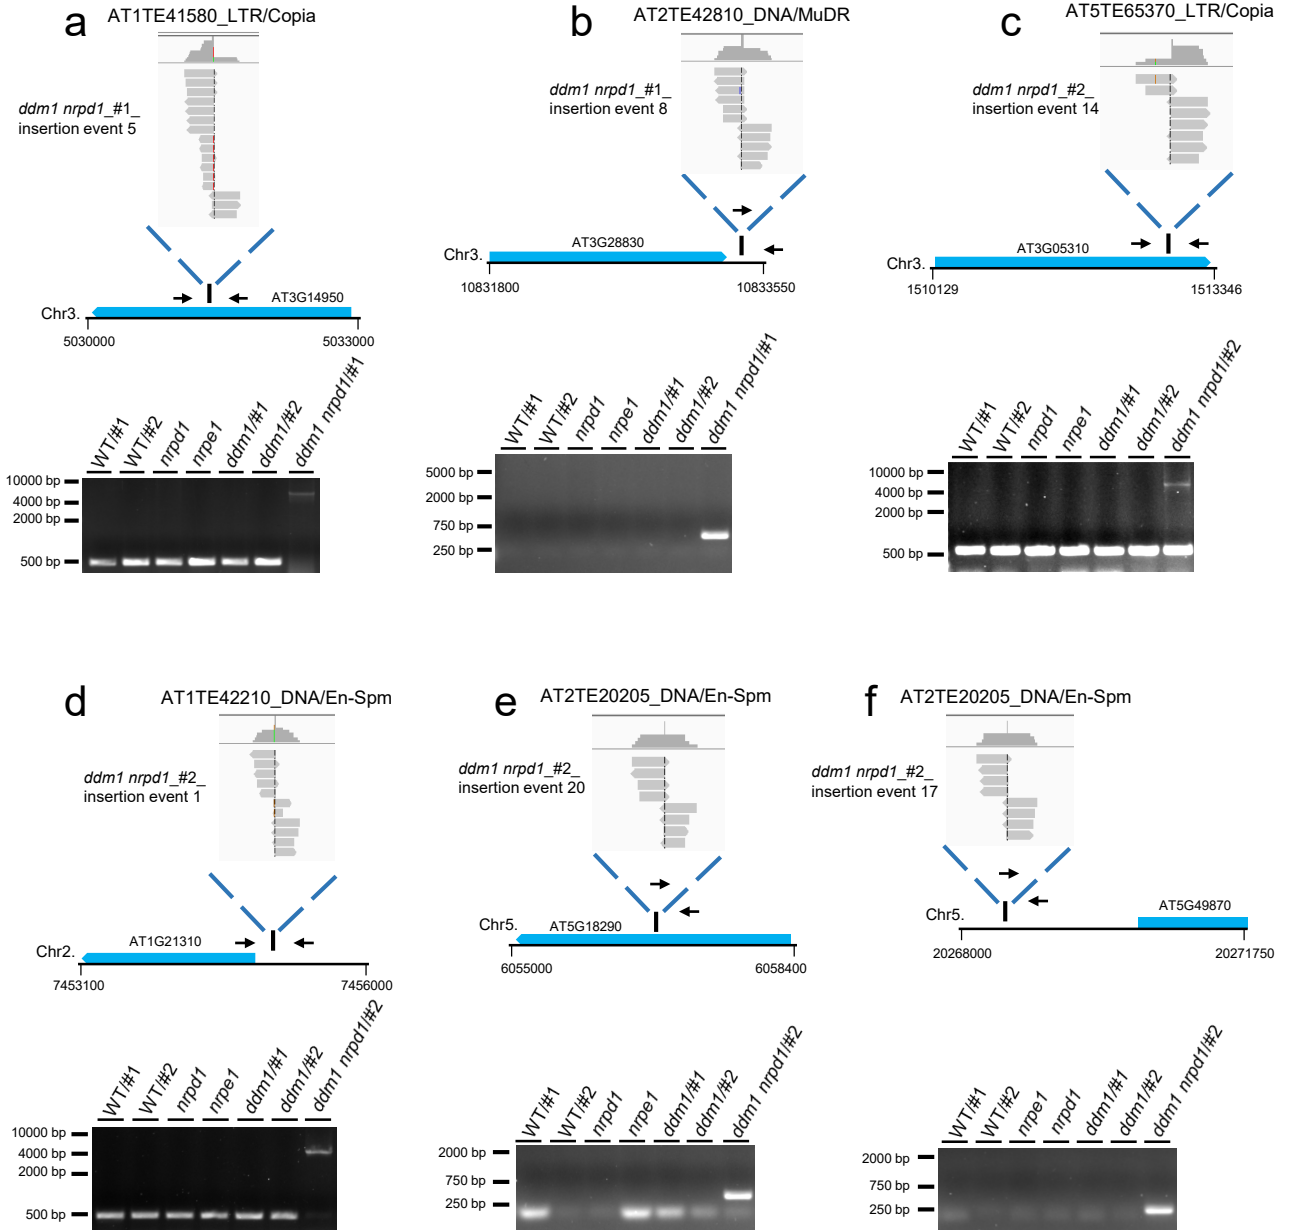

**Supplementary Fig. 4. New TE insertions identified in *ddm1 nrpd1* and confirmed by PCR.**

Primer positions are indicated (black arrows). Upper panel, IGV screenshots showing split-reads at the TE insertion sites.

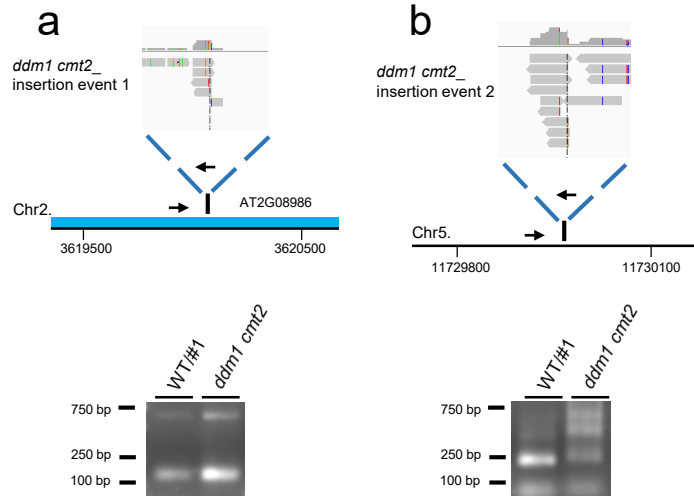

**Supplementary Fig. 5. The putative TE insertions in *ddm1 cmt2* could not be confirmed.**  
 Primer positions are indicated (black arrows). Upper panel, IGV screenshots showing split-reads at the TE insertion sites.

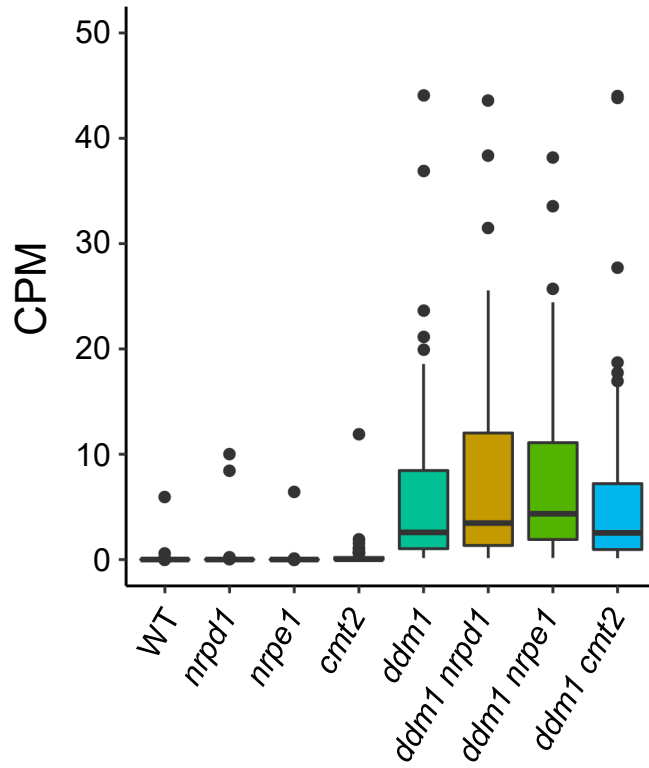

**Supplementary Fig. 6. Boxplots of the expression levels of transposed TE subfamilies from *ddm1 nrpd1* in the indicated genotypes.** CPM (Counts per million) were averaged from biological replicates. The horizontal line within the box represents the median; the whiskers extend to 1.5 times the interquartile range; and the lower and upper boundaries of the box represent the first and third quartiles, respectively.

Supplementary Table 1. Summary of whole-genome bisulfite sequencing data

| <b>Samples</b>           | <b>Raw reads</b> | <b>Clean reads</b> | <b>Unique mapped rates</b> | <b>Multiple mapped rates</b> | <b>Coverage</b> | <b>Conversion rates</b> |
|--------------------------|------------------|--------------------|----------------------------|------------------------------|-----------------|-------------------------|
| WT_rep 1                 | 36,264,579       | 32,559,941         | 77.5%                      | 90.3%                        | 16.91           | 99.86%                  |
| WT_rep 2                 | 36,267,633       | 32,197,538         | 76.9%                      | 89.4%                        | 16.77           | 99.83%                  |
| <i>nrpd1</i> _rep 1      | 29,336,271       | 26,163,948         | 77.1%                      | 91.1%                        | 13.48           | 99.84%                  |
| <i>nrpd1</i> _rep 2      | 36,262,399       | 32,870,411         | 77.2%                      | 90.7%                        | 16.89           | 99.85%                  |
| <i>nrpe1</i> _rep 1      | 39,677,251       | 35,308,859         | 76.9%                      | 90.8%                        | 18.12           | 99.87%                  |
| <i>nrpe1</i> _rep 2      | 34,845,602       | 31,371,293         | 77.5%                      | 90.9%                        | 15.82           | 99.86%                  |
| <i>ddm1</i> _rep 1       | 32,475,420       | 29,265,663         | 75.6%                      | 91.0%                        | 14.70           | 99.86%                  |
| <i>ddm1</i> _rep 2       | 36,645,583       | 32,887,312         | 75.2%                      | 90.9%                        | 16.00           | 99.86%                  |
| <i>ddm1 nrpd1</i> _rep 1 | 37,391,733       | 31,324,280         | 83.7%                      | 92.6%                        | 13.71           | 99.92%                  |
| <i>ddm1 nrpd1</i> _rep 2 | 33,159,491       | 28,052,780         | 83.4%                      | 92.6%                        | 12.01           | 99.93%                  |
| <i>ddm1 nrpe1</i> _rep 1 | 34,299,641       | 28,984,929         | 81.1%                      | 91.3%                        | 11.49           | 99.91%                  |
| <i>ddm1 nrpe1</i> _rep 2 | 54,575,907       | 46,418,075         | 83.5%                      | 93.5%                        | 17.36           | 99.70%                  |
| <i>cmt2</i>              | 32,703,998       | 29,165,447         | 78.0%                      | 88.3%                        | 17.35           | 99.04%                  |
| <i>ddm1 cmt2</i>         | 32,621,092       | 29,740,205         | 76.3%                      | 87.9%                        | 16.31           | 99.59%                  |

Supplementary Table 2. Summary of ChIP sequencing data

| <b>Samples</b>                     | <b>Raw reads</b> | <b>Clean reads</b> | <b>Mutiple mapped rates</b> | <b>Unique mapped rates</b> |
|------------------------------------|------------------|--------------------|-----------------------------|----------------------------|
| WT_rep1                            | 15,933,198       | 10,701,417         | 76.9%                       | 56.1%                      |
| WT_rep2                            | 15,731,918       | 11,235,065         | 58.9%                       | 37.9%                      |
| <i>nrdp1</i> /NRPD1-Flag_rep1      | 16,400,098       | 11,219,757         | 83.3%                       | 55.5%                      |
| <i>nrdp1</i> /NRPD1-Flag_rep2      | 12,280,039       | 8,118,607          | 85.3%                       | 55.7%                      |
| <i>ddm1</i> _rep1                  | 16,235,710       | 12,414,327         | 58.1%                       | 33.7%                      |
| <i>ddm1</i> _rep2                  | 11,074,701       | 7,971,309          | 68.4%                       | 39.5%                      |
| <i>ddm1 nrdp1</i> /NRPD1-Flag_rep1 | 20,073,114       | 15,578,487         | 91.1%                       | 54.3%                      |
| <i>ddm1 nrdp1</i> /NRPD1-Flag_rep2 | 13,968,551       | 9,581,040          | 81.8%                       | 49.3%                      |



Supplementary Table 3. The CMT2-to-RdDM loci that overlap with *Athila6A* TEs

| Category of loci  | Chromosome | Start    | End      | TE ID      | TE subfamily | TE Superfamily |
|-------------------|------------|----------|----------|------------|--------------|----------------|
| CMT2-to-RdDM loci | Chr1       | 13794006 | 13794194 | AT1TE45175 | ATHILA6A     | LTR/Gypsy      |
| CMT2-to-RdDM loci | Chr1       | 13794953 | 13795247 | AT1TE45175 | ATHILA6A     | LTR/Gypsy      |
| CMT2-to-RdDM loci | Chr1       | 13794953 | 13795247 | AT1TE45180 | ATHILA6A     | LTR/Gypsy      |
| CMT2-to-RdDM loci | Chr1       | 13863406 | 13863647 | AT1TE45475 | ATHILA6A     | LTR/Gypsy      |
| CMT2-to-RdDM loci | Chr1       | 15638626 | 15638795 | AT1TE51475 | ATHILA6A     | LTR/Gypsy      |
| CMT2-to-RdDM loci | Chr2       | 2401808  | 2402297  | AT2TE10985 | ATHILA6A     | LTR/Gypsy      |
| CMT2-to-RdDM loci | Chr2       | 3637251  | 3637499  | AT2TE15880 | ATHILA6A     | LTR/Gypsy      |
| CMT2-to-RdDM loci | Chr2       | 4184002  | 4184599  | AT2TE17640 | ATHILA6A     | LTR/Gypsy      |
| CMT2-to-RdDM loci | Chr2       | 4202903  | 4203342  | AT2TE17730 | ATHILA6A     | LTR/Gypsy      |
| CMT2-to-RdDM loci | Chr2       | 4504506  | 4504697  | AT2TE18860 | ATHILA6A     | LTR/Gypsy      |
| CMT2-to-RdDM loci | Chr2       | 4521459  | 4521890  | AT2TE18895 | ATHILA6A     | LTR/Gypsy      |
| CMT2-to-RdDM loci | Chr2       | 4989333  | 4990081  | AT2TE20440 | ATHILA6A     | LTR/Gypsy      |
| CMT2-to-RdDM loci | Chr2       | 5995417  | 5995650  | AT2TE24385 | ATHILA6A     | LTR/Gypsy      |
| CMT2-to-RdDM loci | Chr2       | 5996237  | 5996398  | AT2TE24385 | ATHILA6A     | LTR/Gypsy      |
| CMT2-to-RdDM loci | Chr3       | 13585851 | 13586032 | AT3TE55255 | ATHILA6A     | LTR/Gypsy      |
| CMT2-to-RdDM loci | Chr3       | 13654460 | 13654641 | AT3TE55395 | ATHILA6A     | LTR/Gypsy      |
| CMT2-to-RdDM loci | Chr3       | 13662652 | 13663043 | AT3TE55425 | ATHILA6A     | LTR/Gypsy      |
| CMT2-to-RdDM loci | Chr3       | 13823358 | 13823594 | AT3TE56710 | ATHILA6A     | LTR/Gypsy      |
| CMT2-to-RdDM loci | Chr3       | 13969355 | 13969541 | AT3TE57345 | ATHILA6A     | LTR/Gypsy      |
| CMT2-to-RdDM loci | Chr3       | 14099403 | 14099698 | AT3TE57785 | ATHILA6A     | LTR/Gypsy      |
| CMT2-to-RdDM loci | Chr3       | 14410306 | 14410475 | AT3TE59105 | ATHILA6A     | LTR/Gypsy      |
| CMT2-to-RdDM loci | Chr3       | 14410552 | 14410799 | AT3TE59105 | ATHILA6A     | LTR/Gypsy      |
| CMT2-to-RdDM loci | Chr3       | 14551064 | 14551292 | AT3TE59610 | ATHILA6A     | LTR/Gypsy      |
| CMT2-to-RdDM loci | Chr3       | 14804203 | 14804399 | AT3TE60460 | ATHILA6A     | LTR/Gypsy      |
| CMT2-to-RdDM loci | Chr3       | 14804455 | 14804846 | AT3TE60460 | ATHILA6A     | LTR/Gypsy      |
| CMT2-to-RdDM loci | Chr4       | 2885701  | 2885894  | AT4TE13480 | ATHILA6A     | LTR/Gypsy      |
| CMT2-to-RdDM loci | Chr4       | 3284803  | 3284999  | AT4TE15030 | ATHILA6A     | LTR/Gypsy      |
| CMT2-to-RdDM loci | Chr4       | 3484424  | 3484575  | AT4TE15755 | ATHILA6A     | LTR/Gypsy      |
| CMT2-to-RdDM loci | Chr4       | 3629901  | 3630094  | AT4TE16175 | ATHILA6A     | LTR/Gypsy      |
| CMT2-to-RdDM loci | Chr4       | 3916552  | 3916733  | AT4TE17115 | ATHILA6A     | LTR/Gypsy      |
| CMT2-to-RdDM loci | Chr4       | 4176602  | 4176800  | AT4TE18060 | ATHILA6A     | LTR/Gypsy      |
| CMT2-to-RdDM loci | Chr4       | 4414306  | 4414536  | AT4TE18705 | ATHILA6A     | LTR/Gypsy      |
| CMT2-to-RdDM loci | Chr5       | 10581909 | 10582246 | AT5TE38625 | ATHILA6A     | LTR/Gypsy      |
| CMT2-to-RdDM loci | Chr5       | 11809472 | 11809700 | AT5TE42435 | ATHILA6A     | LTR/Gypsy      |
| CMT2-to-RdDM loci | Chr5       | 12139801 | 12140045 | AT5TE43260 | ATHILA6A     | LTR/Gypsy      |
| CMT2-to-RdDM loci | Chr5       | 12140256 | 12140446 | AT5TE43260 | ATHILA6A     | LTR/Gypsy      |
| CMT2-to-RdDM loci | Chr5       | 12410709 | 12410938 | AT5TE43980 | ATHILA6A     | LTR/Gypsy      |
| CMT2-to-RdDM loci | Chr5       | 12611707 | 12611947 | AT5TE44690 | ATHILA6A     | LTR/Gypsy      |
| CMT2-to-RdDM loci | Chr5       | 12747051 | 12747299 | AT5TE45065 | ATHILA6A     | LTR/Gypsy      |
| CMT2-to-RdDM loci | Chr5       | 13011851 | 13012100 | AT5TE46215 | ATHILA6A     | LTR/Gypsy      |

Supplementary Table 4. Summary of RNA sequencing data

| <b>Samples</b>          | <b>Raw reads</b> | <b>Clean reads</b> | <b>Mutiple mapped rates</b> | <b>Unique mapped rates</b> |
|-------------------------|------------------|--------------------|-----------------------------|----------------------------|
| <i>ddm1_rep 1</i>       | 15,450,933       | 8,393,308          | 95.1%                       | 93%                        |
| <i>ddm1_rep 2</i>       | 14,302,536       | 7,566,163          | 94.8%                       | 93%                        |
| <i>ddm1_rep 3</i>       | 19,031,784       | 9,739,562          | 94.8%                       | 92.5%                      |
| <i>ddm1 nrpd1_rep 1</i> | 19,827,888       | 15,532,920         | 96.1%                       | 94%                        |
| <i>ddm1 nrpd1_rep 2</i> | 29,980,975       | 23,949,867         | 96.7%                       | 94.8%                      |
| <i>ddm1 nrpd1_rep 3</i> | 18,114,078       | 14,413,851         | 96.2%                       | 94.1%                      |
| <i>ddm1 nrpe1_rep 1</i> | 19,985,707       | 15,653,033         | 95.7%                       | 93.3%                      |
| <i>ddm1 nrpe1_rep 2</i> | 21,719,250       | 17,284,010         | 96.3%                       | 94%                        |
| <i>ddm1 nrpe1_rep 3</i> | 22,013,606       | 17,849,217         | 96.5%                       | 94.5%                      |
| <i>ddm1 cmt2_rep 1</i>  | 14,700,829       | 10,363,894         | 96.7%                       | 95.3%                      |
| <i>ddm1 cmt2_rep 2</i>  | 25,254,592       | 17,238,531         | 97%                         | 95.6%                      |
| <i>ddm1 cmt2_rep 3</i>  | 16,556,494       | 11,139,750         | 94.8%                       | 93.4%                      |

Supplementary Table 5. Summary of DNA sequencing data

| <b>Samples</b>         | <b>Raw reads</b> | <b>Clean reads</b> | <b>Mutiple mapped rates</b> | <b>Unique mapped rates</b> |
|------------------------|------------------|--------------------|-----------------------------|----------------------------|
| WT/#1                  | 21,669,780       | 19,792,467         | 96.1%                       | 67.3%                      |
| WT/#2                  | 21,302,454       | 19,481,752         | 95.3%                       | 64%                        |
| <i>nrpd1</i>           | 19,330,958       | 17,763,119         | 94.8%                       | 62.2%                      |
| <i>ddm1</i> #1         | 18,779,262       | 17,205,352         | 94.9%                       | 65.5%                      |
| <i>ddm1</i> #2         | 19,241,410       | 17,599,640         | 94.9%                       | 65%                        |
| <i>ddm1-1 nrpd1</i> #1 | 19,495,655       | 17,866,798         | 86.8%                       | 60.7%                      |
| <i>ddm1-1 nrpd1</i> #2 | 18,261,733       | 16,708,944         | 90.2%                       | 63.5%                      |
| <i>ddm1 cmt2</i>       | 18,345,052       | 17,502,246         | 86.5%                       | 61.3%                      |

Supplementary Table 6. Summary of putative TE transposition events identified in *ddm1 nrp1* and *ddm1 cmt2*

| Samples             | Insertion events | Chromosome | Start    | End      | TE family | TE         | Validation of PCR |
|---------------------|------------------|------------|----------|----------|-----------|------------|-------------------|
| <i>ddm1 nrp1</i> #1 | 1                | Chr1       | 15543127 | 15543136 | ATCOPIA93 | AT1TE41580 | -                 |
|                     | 2                | Chr1       | 25709672 | 25709680 | ATCOPIA93 | AT1TE41580 | -                 |
|                     | 3                | Chr2       | 11195486 | 11195492 | ATCOPIA93 | AT1TE41580 | -                 |
|                     | 4                | Chr2       | 5858678  | 5858687  | ATCOPIA93 | AT1TE41580 | -                 |
|                     | 5                | Chr3       | 5031388  | 5031394  | ATCOPIA93 | AT1TE41580 | True              |
|                     | 6                | Chr4       | 13975703 | 13975708 | ATCOPIA93 | AT1TE41580 | -                 |
|                     | 7                | Chr1       | 13939816 | 13939826 | VANDAL21  | AT2TE42810 | -                 |
|                     | 8                | Chr3       | 10833383 | 10833392 | VANDAL21  | AT2TE42810 | True              |
|                     | 9                | Chr3       | 5627951  | 5627960  | ATCOPIA93 | AT1TE41580 | -                 |
|                     | 10               | Chr4       | 16492663 | 16492671 | ATCOPIA21 | AT5TE65370 | -                 |
|                     | 11               | Chr5       | 18766909 | 18766918 | ATCOPIA93 | AT5TE20395 | True              |
| <i>ddm1 nrp1</i> #2 | 1                | Chr1       | 7455158  | 7455167  | ATENSPM3  | AT1TE42210 | Ture              |
|                     | 2                | Chr3       | 14202166 | 14202173 | ATGPN2    | AT2TE00120 | -                 |
|                     | 3                | Chr4       | 2688712  | 2688717  | ATENSPM3  | AT1TE42210 | -                 |
|                     | 4                | Chr2       | 14784634 | 14784638 | ATENSPM3  | AT1TE42210 | -                 |
|                     | 5                | Chr2       | 5055616  | 5055621  | ATENSPM3  | AT2TE18415 | -                 |
|                     | 6                | Chr3       | 14991078 | 14991083 | ATENSPM3  | AT2TE18415 | -                 |
|                     | 7                | Chr4       | 1190326  | 1190330  | ATENSPM3  | AT2TE18415 | -                 |
|                     | 8                | Chr5       | 19987920 | 19987928 | ATCOPIA93 | AT1TE41580 | -                 |
|                     | 9                | Chr5       | 26130632 | 26130638 | ATENSPM3  | AT1TE42210 | -                 |
|                     | 10               | Chr5       | 5877092  | 5877095  | ATENSPM3  | AT2TE18415 | -                 |
|                     | 11               | Chr1       | 20347534 | 20347537 | ATENSPM3  | AT2TE20205 | -                 |
|                     | 12               | Chr1       | 29450386 | 29450390 | ATENSPM3  | AT2TE20205 | -                 |
|                     | 13               | Chr1       | 30246543 | 30246549 | ATCOPIA21 | AT5TE65370 | -                 |
|                     | 14               | Chr3       | 1512728  | 1512733  | ATCOPIA21 | AT5TE65370 | True              |
|                     | 15               | Chr3       | 4956195  | 4956199  | ATENSPM3  | AT2TE20205 | True              |
|                     | 16               | Chr4       | 9758568  | 9758572  | ATENSPM3  | AT2TE20205 | -                 |
|                     | 17               | Chr5       | 20268875 | 20268878 | ATENSPM3  | AT2TE20205 | True              |
|                     | 18               | Chr5       | 20758651 | 20758656 | ATENSPM3  | AT2TE20205 | -                 |
|                     | 19               | Chr5       | 23922941 | 23922944 | ATENSPM3  | AT2TE20205 | -                 |
|                     | 20               | Chr5       | 6056700  | 6056703  | ATENSPM3  | AT2TE20205 | Ture              |
|                     | 21               | Chr5       | 6058222  | 6058225  | ATENSPM3  | AT2TE20205 | -                 |
|                     | 22               | Chr5       | 9358929  | 9358932  | ATENSPM3  | AT2TE20205 | -                 |
| <i>ddm1 cmt2</i>    | 1                | Chr2       | 3620073  | 3620076  | ATREP18   | AT4TE14735 | False             |
|                     | 2                | Chr5       | 11730474 | 11730478 | ATREP18   | AT4TE14735 | False             |

Supplementary Table 7. Primers used in this study

| <b>Primers for new TE insertion identify</b> |                             |                             |
|----------------------------------------------|-----------------------------|-----------------------------|
| <b>Insertion events</b>                      | <b>Forward (5' &gt; 3')</b> | <b>Reverse (5' &gt; 3')</b> |
| <i>ddm1 nrpd1/#1_5</i>                       | CGTTACCACGATCACGCGCT        | TGCAGCCATTGCGTCTGGAGC       |
| <i>ddm1 nrpd1/#1_8</i>                       | GGGACTGGCCAGACGATTAT        | TTTCGGGATATTACTATTTCACT     |
| <i>ddm1 nrpd1/#1_11</i>                      | CTCTCTTAATCTTTAATACAATTCCGC | GGGTTGTGTGGAGATGCACCG       |
| <i>ddm1 nrpd1/#2_1</i>                       | AAGAGGCCATTGGAGACCCCAT      | CCGGAAAAAGAAAACTCAAGAGGCCA  |
| <i>ddm1 nrpd1/#2_14</i>                      | GTGTTTGGTCCCAAGAATGCTGGA    | GGGGATTCTCTGCCGCGGTT        |
| <i>ddm1 nrpd1/#2_15</i>                      | TGGCTCGTGATCTCATCAAACCTTCT  | TCCTCCAATTCCACAAGGCTTCC     |
| <i>ddm1 nrpd1/#2_17</i>                      | AGCGCTTTTCACTGGCTAATAATG    | TCTTAGATCCCGTAAATCGGCAAGACA |
| <i>ddm1 nrpd1/#2_20</i>                      | CTGGCTAATAATGTTGATATTTGT    | CCCAAGAGGGGTCTTGGCCT        |
| <i>ddm1 cmt2_1</i>                           | GGACTCATATGGACTTTGGGCTACACC | TGTCATGTGTATGATTGAGTATA     |
| <i>ddm1 cmt2_2</i>                           | TGAAGCTTGGTTAGTGTTTTGGAGTGA | GACATCAAGTCATAACTGACTCCAA   |
